# Supplementary material for: In Silico Reconstitution of Actin-Based Symmetry Breaking and Motility
Source: PLoS Biol. 2009 Sep 22;7(9):e1000201. doi: 10.1371/journal.pbio.1000201 (PMC2738636; doi:10.1371/journal.pbio.1000201)
Supplement: Figure S1 — Diagram of network and forces acting on nodes. (0.04 MB PDF) [file pbio.1000201.s001.pdf]

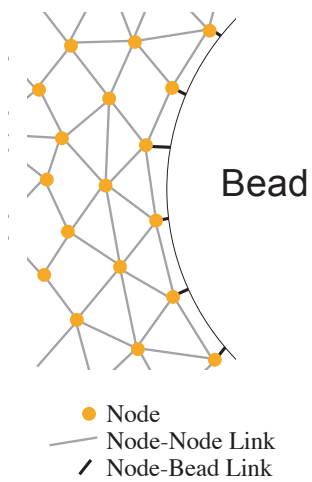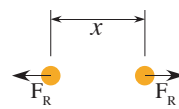

Force

Repulsion

Functional Form

Inverse Square

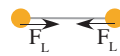

Link

Linear (Hookean Spring)

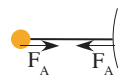

Bead Attachment

Linear (Hookean Spring)
