# Supplementary material for: In Silico Reconstitution of Actin-Based Symmetry Breaking and Motility
Source: PubMed Central journal article supplement (PMC2738636; doi:10.1371/journal.pbio.1000201), 2009-09-22

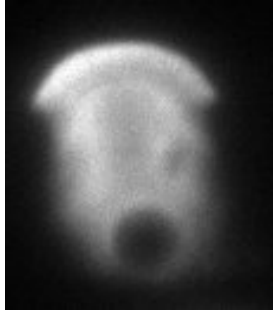

(3D interactive model)

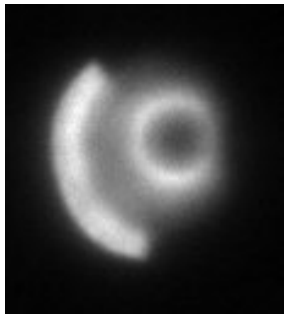

(3D interactive model)

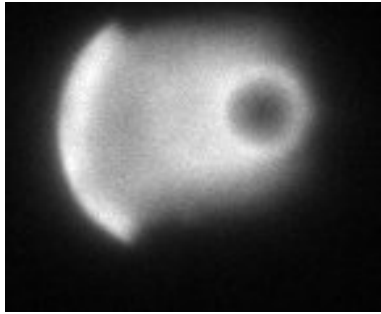

(3D interactive model)

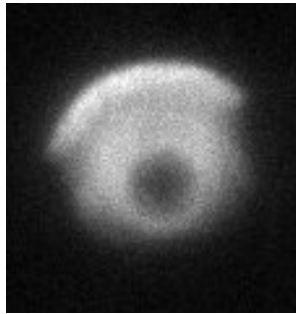

Supplement: pbio.1000201.s005.pdf [file pbio.1000201.s005.pdf]
